# Supplementary material
Source: PubMed Central journal article supplement (PMC4676410)
Supplement: NIHMS735374-supplement-Supplemental.pdf [file NIHMS735374-supplement-Supplemental.pdf]

## SUPPLEMENTAL

### **Structure-based design of a small molecule CD4-antagonist with broad spectrum anti-HIV-1 activity**

Francesca Curreli<sup>a¶</sup>, Young Do Kwon<sup>b¶</sup>, Hongtao Zhang<sup>a</sup>, Daniel Scacalossi<sup>a</sup>, Dmitry S. Belov<sup>c</sup>, Artur A. Tikhonov<sup>c</sup>, Ivan A. Andreev<sup>c</sup>, Andrea Altieri<sup>c</sup>, Alexander V. Kurkin<sup>c</sup>, Peter D. Kwong<sup>b</sup> & Asim K. Debnath<sup>a\*</sup>

<sup>a</sup>Laboratory of Molecular Modeling and Drug Design, Lindsey F. Kimball Research Institute, New York Blood Center, New York, NY 10065, USA.

<sup>b</sup>Vaccine Research Center, National Institute of Allergy and Infectious Diseases, National Institutes of Health, Bethesda, MD 20892, USA.

<sup>c</sup>EDASA Scientific, Scientific Park, Moscow State University, Leninskie Gory, Bld.75, 77 – 101b; 119992 Moscow - Russia

¶ These authors contributed equally.

Address for communication: Dr. Asim K Debnath (adebnath@nybloodcenter.org)

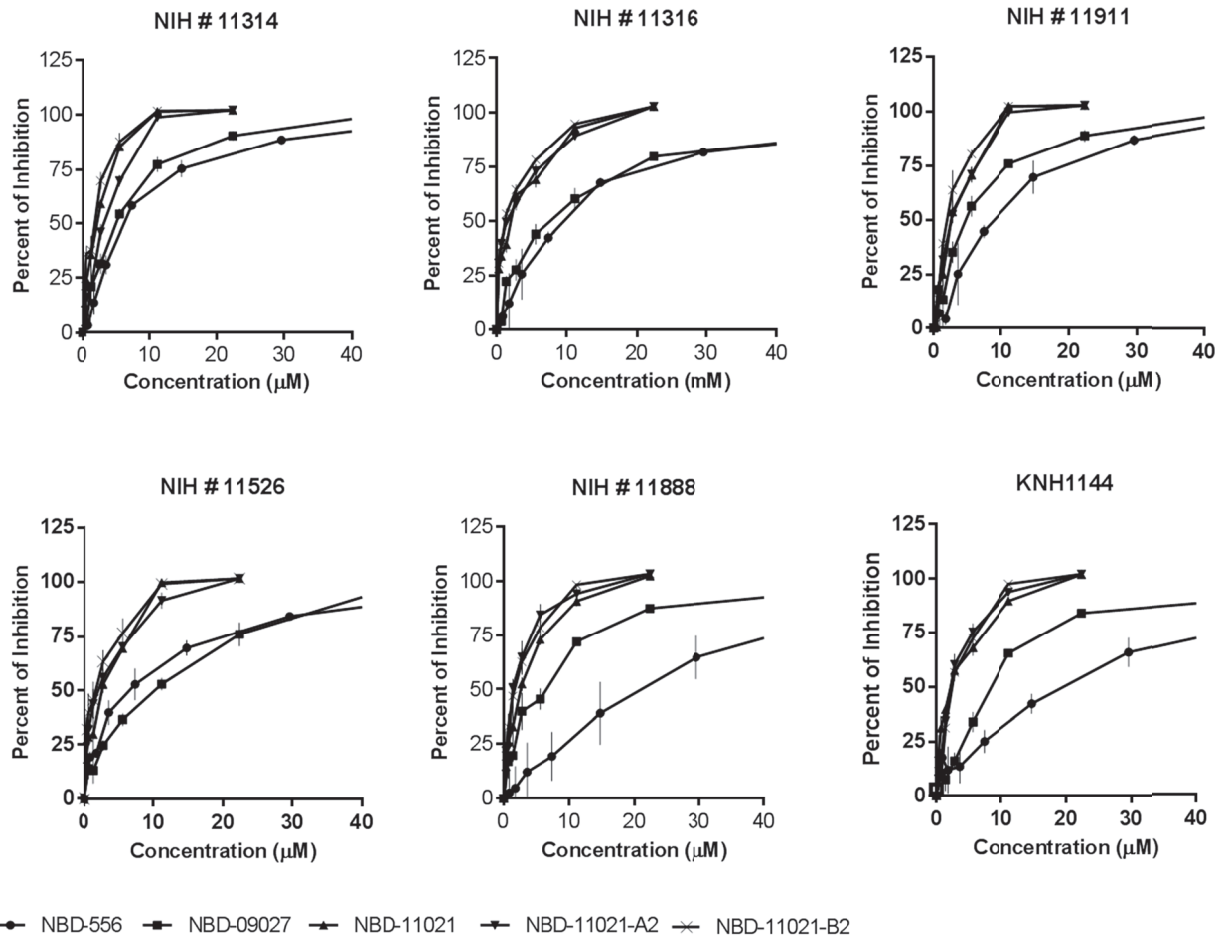

**Figure S1:** Representative dose-dependent inhibition of NBD compounds against ENV-pseudotyped HIV-1. Experiments were performed in triplicate, and data is shown as mean  $\pm$  standard deviation.

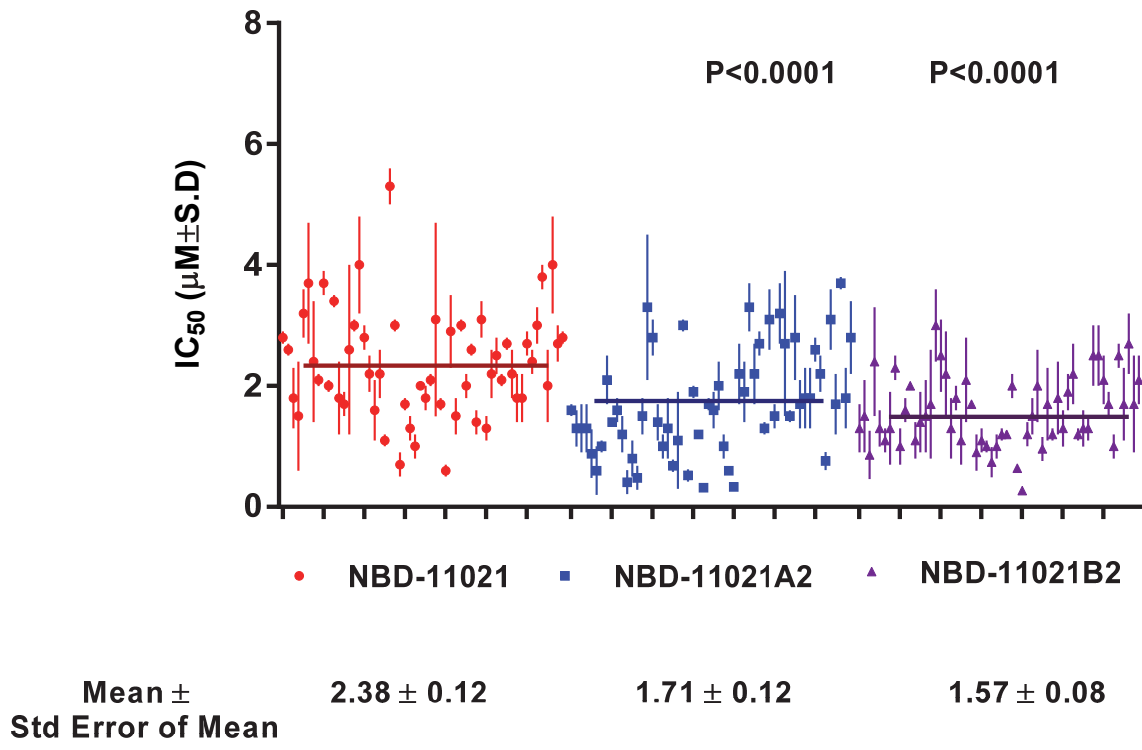

**Figure S2.** Comparison of  $IC_{50}$  of fractions NBD-11021-A2 and NBD-11021-B2 versus NBD-11021 tested on a large panel of HIV-1 ENV-pseudoviruses including primary and transmitted/founder HIV-1 isolates from different clades. Statistical testing was conducted with the one-way ANOVA, implementing Dunnett's test for adjustments of multiple comparisons, with a significance level set at 0.05.

*NBD-11021A1 & NBD-11021A2 in CDCl<sub>3</sub>*

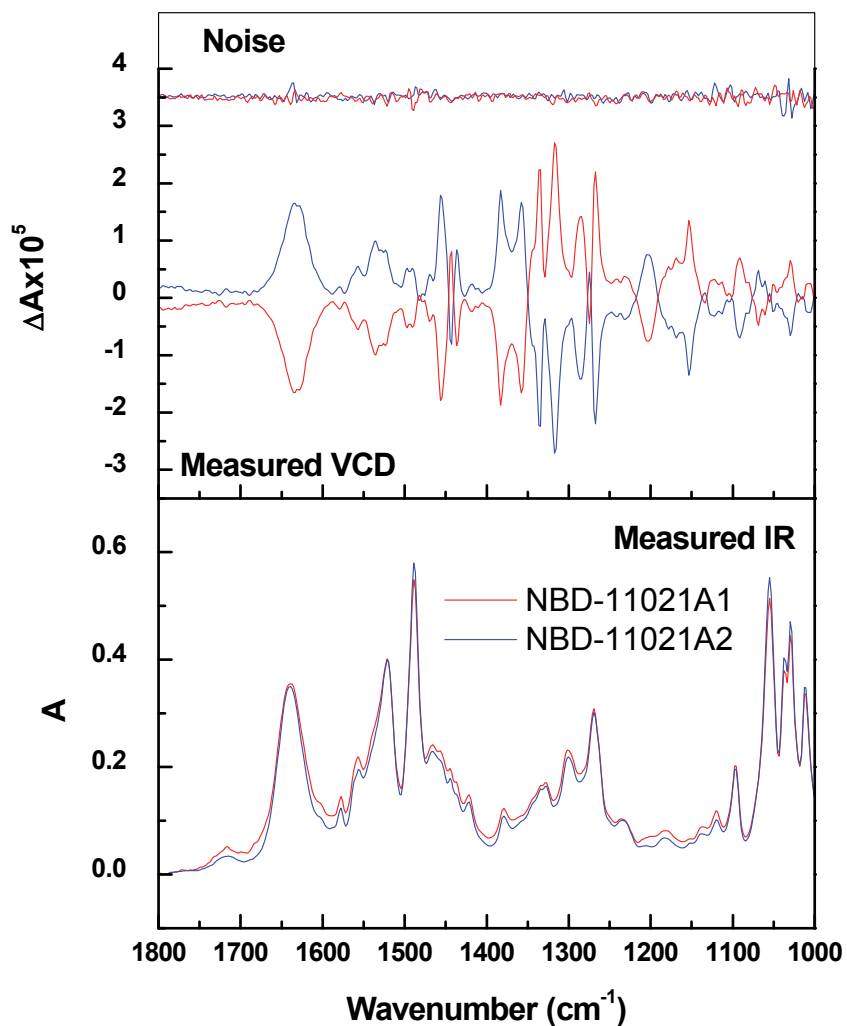

**Figure S3:** IR (lower frame) and VCD (upper frame) spectra of **NBD-11021A1** and **NBD-11021A2** in CDCl<sub>3</sub> (10mg/0.2mL); 0.1mm path-length cell with BaF<sub>2</sub> windows; 6 h collection for samples and solvent; instrument optimized at 1400 cm<sup>-1</sup>. Solvent-subtracted IR and enantiomer-subtracted VCD spectra are shown. Uppermost trace is the VCD noise spectra.

*NBD-11021B1 & NBD-11021B2 in CDCl<sub>3</sub>*

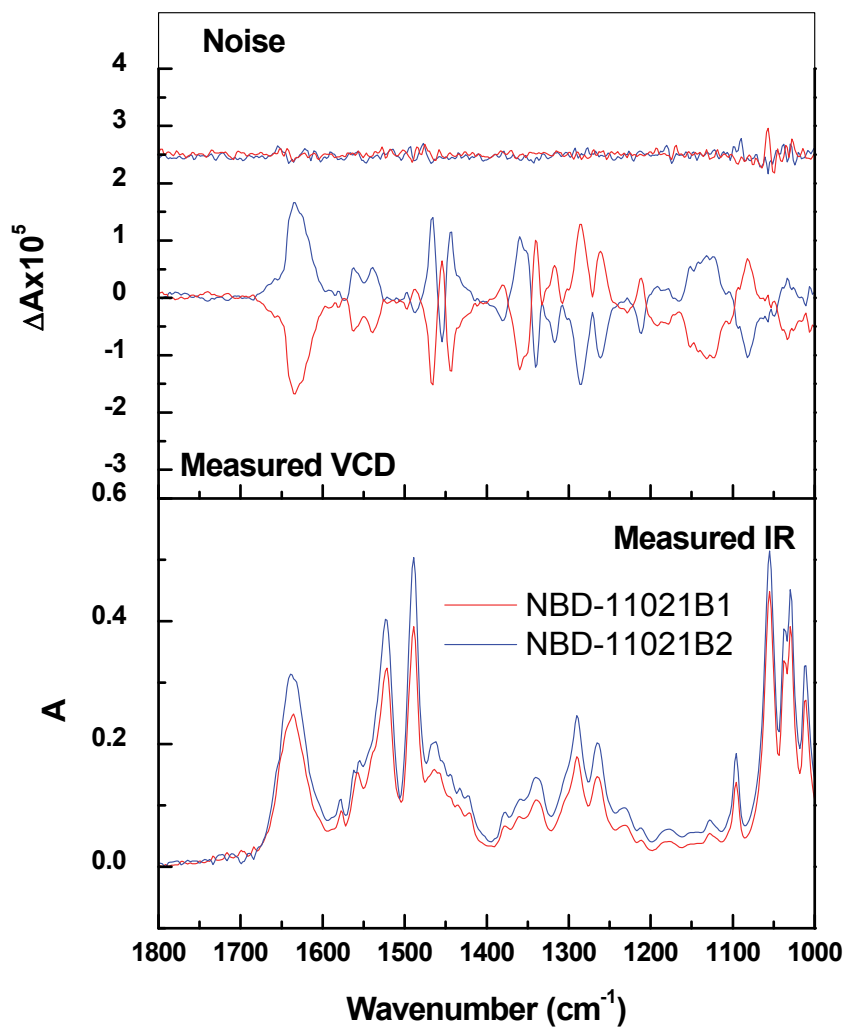

**Figure S4:** IR (lower frame) and VCD (upper frame) spectra of **NBD-11021B1** and **NBD-11021B2** in CDCl<sub>3</sub> (10mg/0.2mL); 0.1mm path-length cell with BaF<sub>2</sub> windows; 6 h collection for samples and solvent; instrument optimized at 1400 cm<sup>-1</sup>. Solvent-subtracted IR and enantiomer-subtracted VCD spectra are shown. Uppermost trace is the VCD noise spectra.

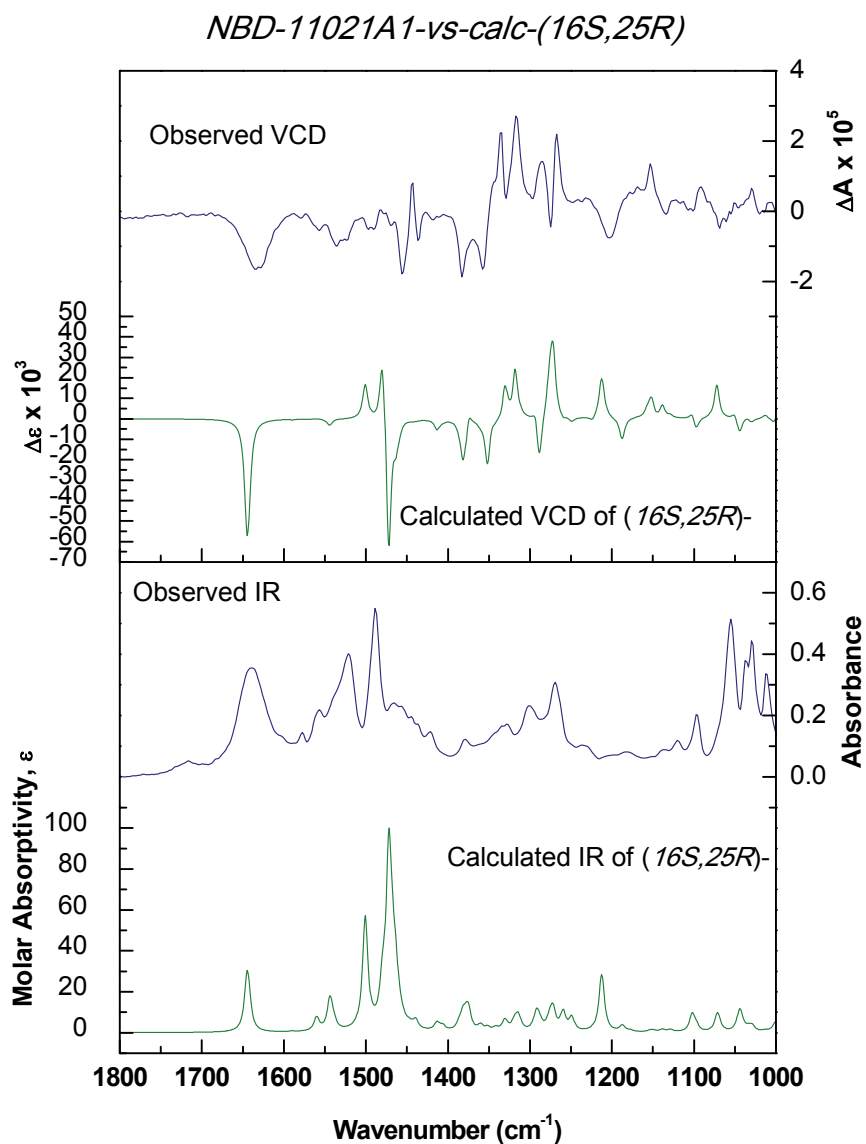

**Figure S5:** IR (lower frame) and VCD (upper frame) spectra observed for **NBD-11021A1** (right axes) compared with calculated Boltzmann-averaged spectra of the calculated conformations for the (16*S*,25*R*)- configuration (left axes).

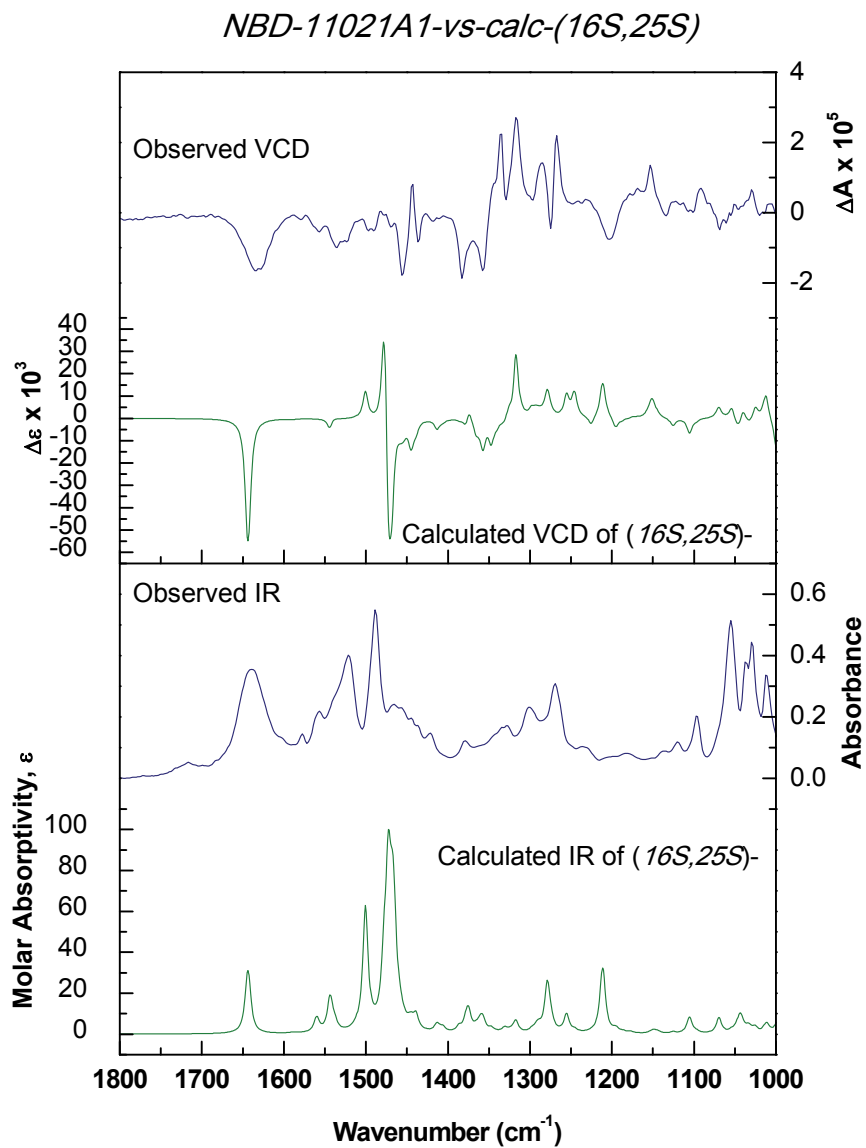

**Figure S6:** IR (lower frame) and VCD (upper frame) spectra observed for **NBD-11021A1** (right axes) compared with calculated Boltzmann-averaged spectra of the calculated conformations for the (16*S*,25*S*)- configuration, (left axes).

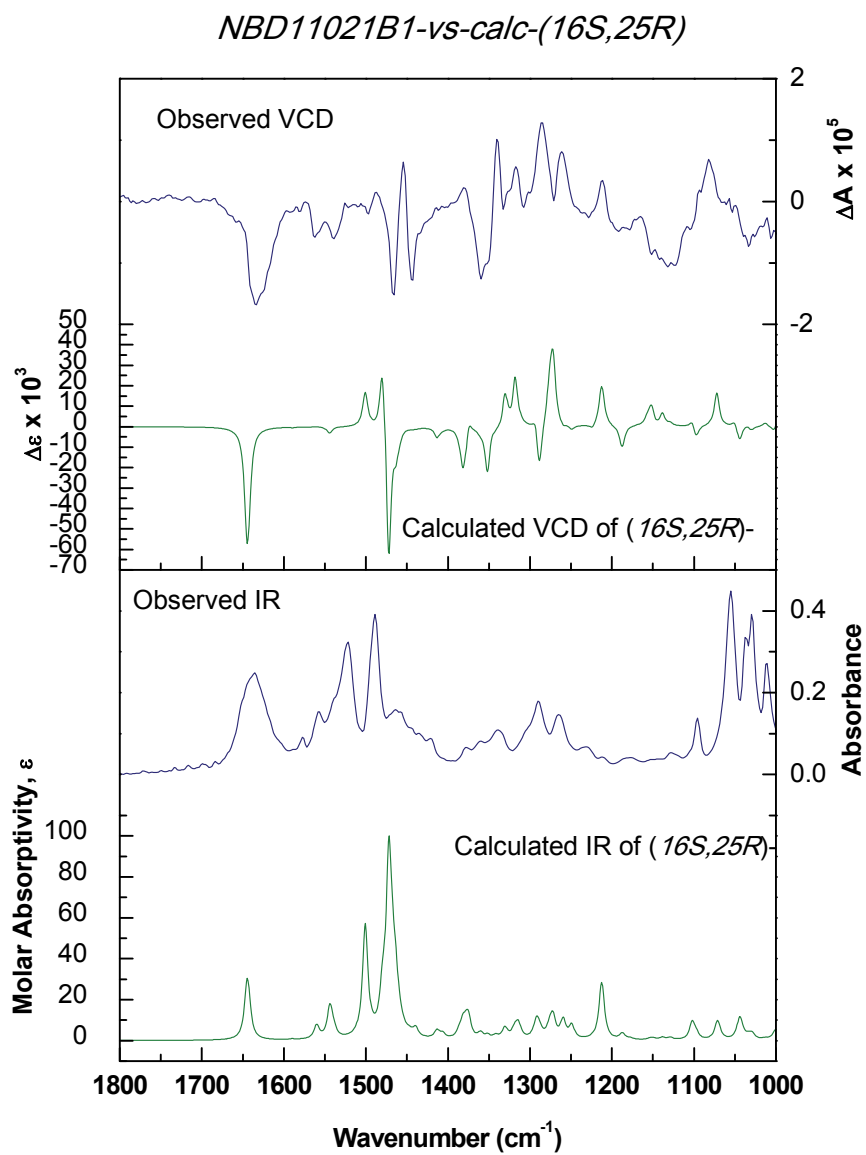

**Figure S7:** IR (lower frame) and VCD (upper frame) spectra observed for **NBD-11021B1** (right axes) compared with calculated Boltzmann-averaged spectra of the calculated conformations for the (16S,25R)- configuration, (left axes).



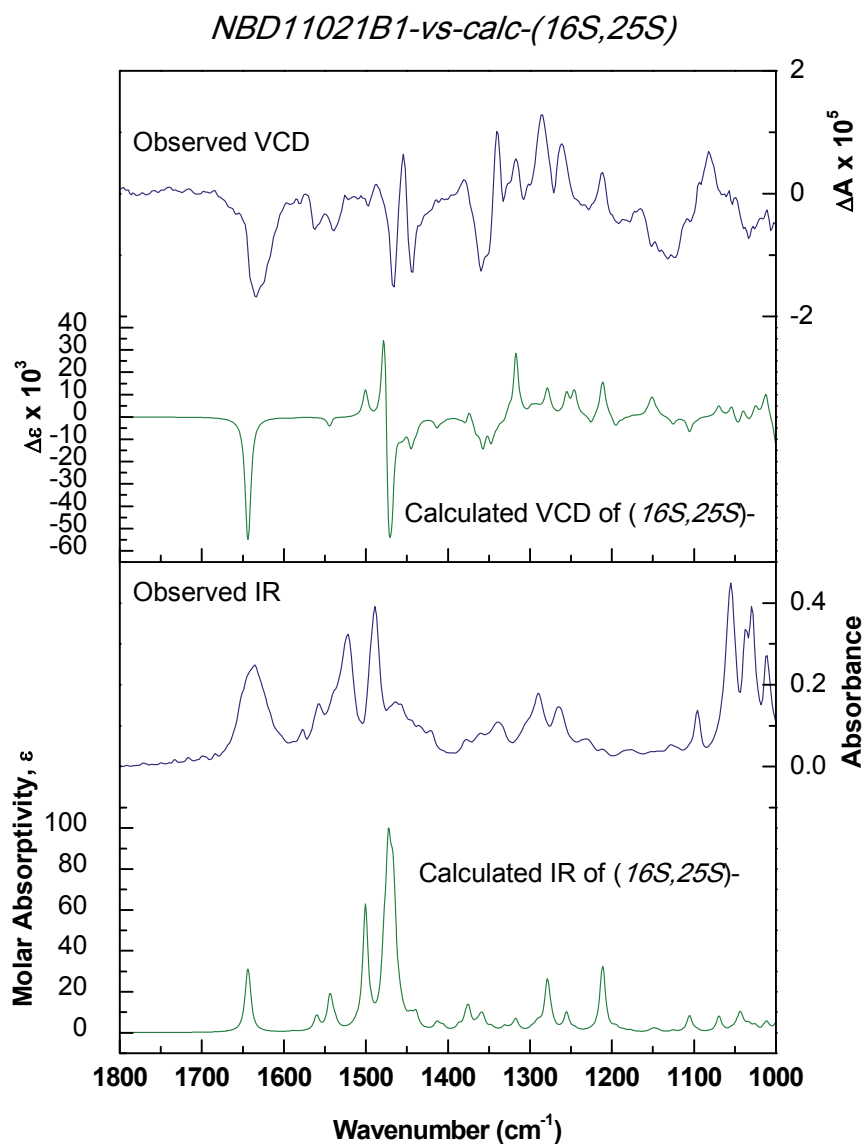

**Figure S8:** IR (lower frame) and VCD (upper frame) spectra observed for **NBD-11021B1** (right axes) compared with calculated Boltzmann-averaged spectra of the calculated conformations for the (16*S*,25*S*)- configuration, (left axes).

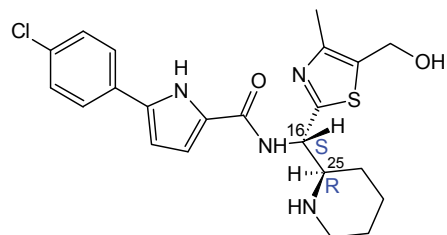

Structure of NBD-11021A1

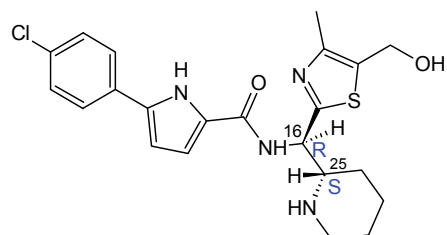

Structure of NBD-11021A2

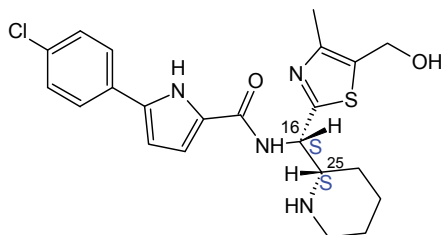

Structure of NBD-11021B1

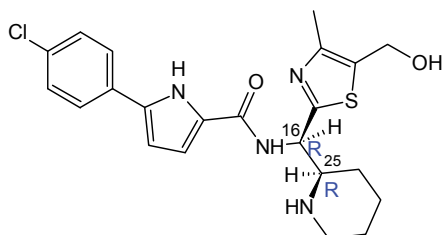

Structure of NBD-11021B2

**Figure S9:** Assignment of the absolute configuration of NBD-11021A1, NBD-11021A2, NBD-11021B1 and NBD-11021B2.

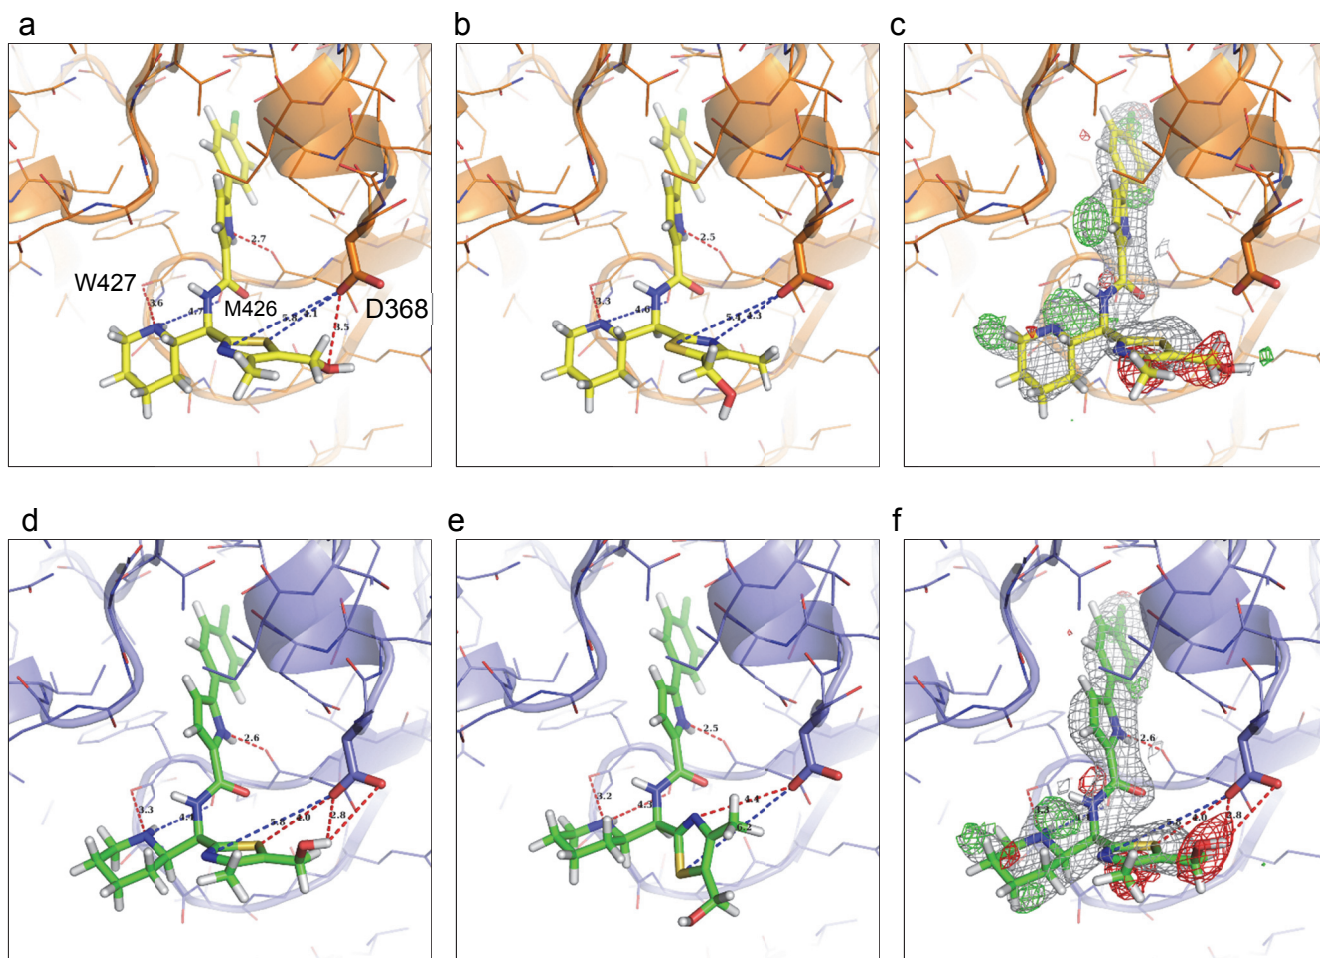

**Figure S10. Putative binding modes of NBD-11021A2 (R,S) and NBD-11021B2 (R,R) enantiomers into the Phe 43 cavity.** (a, b) The thiazole rings of NBD-11021A2 enantiomer face Asp368, which enables either the nitrogen atom or the sulfur atom to make H-bond contacts with Asp368. (c) When the NBD-11021A2 enantiomer modeled in (a) was refined, strong negative *fofc* electron density (red mesh, contoured at  $-3\sigma$ ) appeared at the methyl group and hydroxymethyl group of thiazole ring, indicating that the thiazole ring is not a good fit. Gray mesh,  $2fofc$  electron density contoured at  $1\sigma$ , green mesh, positive *fofc* electron density map contoured at  $3\sigma$ . (d, e) The thiazole rings of NBD-11021B2 enantiomer face Asp368, which enables either the nitrogen atom or the sulfur atom to make H-bond contacts with Asp368. (f) When the NBD-11021B2 enantiomer modeled in (d) was refined, strong negative *fofc* electron density (red mesh, contoured at  $-3\sigma$ ) appeared at the methyl group and hydroxymethyl group of thiazole ring, indicating that the thiazole ring is not a good fit. Gray mesh,  $2fofc$  electron density contoured at  $1\sigma$ , green mesh, positive *fofc* electron density map contoured at  $3\sigma$ .

**Table S1. Crystallographic data collection and refinement statistics**

| NBD-11021:<br>93TH057(H375S)            |                       |
|-----------------------------------------|-----------------------|
| <b>PDB accession code</b>               | 4RZ8                  |
| <b>Data collection</b>                  |                       |
| Space group                             | $P2_1$                |
| Cell constants                          |                       |
| <i>a</i> , <i>b</i> , <i>c</i> (Å)      | 113.6, 68.8, 116.1    |
| $\alpha$ , $\beta$ , $\gamma$ (°)       | 90.0, 110.6, 90.0     |
| Wavelength (Å)                          | 1.00                  |
| Resolution (Å)                          | 50.0-1.82(1.86-1.82)* |
| $R_{\text{merge}}$                      | 6.7 (48.7)            |
| $I / \sigma I$                          | 19.9 (1.3)            |
| Completeness (%)                        | 87.5 (28.1)           |
| Redundancy                              | 3.4 (1.8)             |
| <b>Refinement</b>                       |                       |
| Resolution (Å)                          | 44.0-1.9              |
| Unique reflections                      | 124,367               |
| $R_{\text{work}} / R_{\text{free}}$ (%) | 22.6/24.3             |
| No. atoms                               |                       |
| Protein                                 | 10,579                |
| Ligand/ion                              | 740                   |
| Water                                   | 692                   |
| <i>B</i> -factors (Å <sup>2</sup> )     |                       |
| Protein                                 | 57.9                  |
| Ligand/ion                              | 68.0                  |
| Water                                   | 52.9                  |
| R.m.s. deviations                       |                       |
| Bond lengths (Å)                        | 0.001                 |
| Bond angles (°)                         | 0.422                 |
| Ramachandran                            |                       |
| Favored regions (%)                     | 96.5                  |
| Allowed regions (%)                     | 3.5                   |
| Disallowed regions (%)                  | 0.0                   |

\*Values in parentheses are for highest-resolution shell

**Table S2.** Neutralization activity of NBD-compounds against SIV, SHIV and a set of HIV-2 isolates

| Virus                      | IC <sub>50</sub> (μM±SD) <sup>a</sup> |           |           |
|----------------------------|---------------------------------------|-----------|-----------|
|                            | NBD-556                               | NBD-09027 | NBD-11021 |
| SIV <sub>mac186</sub>      | 12±0.9                                | 6.2±0.4   | ≥11       |
| SHIV <sub>SF162P3</sub>    | 14.2±2.1                              | -         | 8.9±0.4   |
| HIV-2 <sub>CBL-23</sub>    | 29±1                                  | -         | 17.3±0.5  |
| HIV-2 <sub>CBL-20</sub>    | 34.3±0.6                              | -         | 14.8±0.4  |
| HIV-2 <sub>CDC310319</sub> | 36.1±3.5                              | -         | 14.1±1    |
| HIV-2 <sub>CDC310072</sub> | ≥27                                   | ≥13       | ≥14       |
| HIV-2 <sub>MVP-11971</sub> | 10.4±1.3                              | 6.6±0.8   | ≥16       |
| HIV-2 <sub>D194</sub>      | 16.8±3.4                              | 9.4±1.3   | ≥16       |

<sup>a</sup>Values representing the mean ± standard deviation (SD) were obtained from three independent experiments.
